# Supplementary material for: Lack of replication of four candidate SNPs implicated in human male fertility traits: a large-scale population-based study
Source: Oxford University Press journal article supplement (doi:10.1093/humrep/dev081), 2015-04-23
Supplement: dev081_Supplementary_Data.zip [file dev081_Supplementary_Data.zip]

Archive with 5 entries (5 files):
- dev081supp_table3.pdf
- dev081supp_fig1.pdf
- dev081supp_table4.pdf
- dev081supp_table2.pdf
- dev081supp_table1.pdf
