# Supplementary material for: Lack of replication of four candidate SNPs implicated in human male fertility traits: a large-scale population-based study
Source: Oxford University Press journal article supplement (doi:10.1093/humrep/dev081), 2015-04-23
Supplement: dev081_Supplementary_Data.zip [file dev081_Supplementary_Data.zip › dev081supp_table1.pdf]

**Supplementary Table S1** Semen characteristics of fertile men, and young men from the general population in Japan.

|                                   | Fertile<br>(n = 791) | Young<br>(n = 1224) | P       |
|-----------------------------------|----------------------|---------------------|---------|
| Age (years)                       | 31.2 ± 4.8           | 20.8 ± 1.7          | <0.0001 |
| BMI (kg/m <sup>2</sup> )          | 23.3 ± 3.0           | 21.6 ± 2.5          | <0.0001 |
| Ejaculation<br>abstinence (hours) | 193.8 ± 324.7        | 78.5 ± 39.1         | <0.0001 |
| Conc. (× 10 <sup>6</sup> /ml)     | 105.1 ± 83.2         | 76.3 ± 57.6         | <0.0001 |
| Vol. (ml)                         | 3.1 ± 1.5            | 2.9 ± 1.4           | 0.0005  |
| TSN (× 10 <sup>6</sup> )          | 315.8 ± 293.7        | 207.5 ± 178.4       | <0.0001 |
| TMSN (× 10 <sup>6</sup> )         | 181.7 ± 165.0        | 122.7 ± 100.3       | <0.0001 |
| Motility (%)                      | 59.8 ± 20.8          | 59.2 ± 15.1         | 0.525   |

Data are represented as mean ± standard deviation. *P*-values were obtained with Student's unpaired *t*-test.

The sperm concentration, semen volume, total sperm number and total motile sperm number were processed using square-root-transformed values.

Conc., sperm concentration; Vol., semen volume; TSN, total sperm numbers; TMSN, total motile sperm numbers.
