# Supplementary material for: Lack of replication of four candidate SNPs implicated in human male fertility traits: a large-scale population-based study
Source: Oxford University Press journal article supplement (doi:10.1093/humrep/dev081), 2015-04-23
Supplement: dev081_Supplementary_Data.zip [file dev081_Supplementary_Data.zip › dev081supp_table4.pdf]

**Supplementary Table SIV** An association analysis under dominant model between four SNPs and semen parameters in fertile men, and young men from the general population in Japan.

| SNP        | Semen Parameter | Fertile              |              | Young               |              | Combined                          |                   | Heterogeneity    |                    |
|------------|-----------------|----------------------|--------------|---------------------|--------------|-----------------------------------|-------------------|------------------|--------------------|
|            |                 | $\beta$ (SE)         | P            | $\beta$ (SE)        | P            | $\beta$ (SE) [model] <sup>a</sup> | P <sub>meta</sub> | P <sub>het</sub> | I <sup>2</sup> (%) |
| rs7867029  | Conc.           | 0.24 (0.27)          | 0.37         | −0.10 (0.18)        | 0.58         | 0.0075 (0.15) [F]                 | 0.96              | 0.29             | 10.8               |
|            | Vol.            | <b>0.077 (0.031)</b> | <b>0.014</b> | 0.0095 (0.024)      | 0.69         | 0.040 (0.034) [R]                 | 0.23              | 0.86             | 66.0               |
|            | TSN             | 0.95 (0.53)          | 0.070        | −0.074 (0.32)       | 0.81         | 0.35 (0.51) [R]                   | 0.49              | 0.094            | 64.4               |
|            | TMSN            | <b>1.033 (0.41)</b>  | <b>0.012</b> | −0.21 (0.26)        | 0.42         | 0.37 (0.62) [R]                   | 0.55              | 0.011            | 84.7               |
|            | Motility (%)    | 4.4 (2.60)           | 0.091        | <b>−1.98 (0.89)</b> | <b>0.026</b> | 0.74 (3.16) [R]                   | 0.81              | 0.020            | 81.5               |
| rs12870438 | Conc.           | 0.53 (0.33)          | 0.11         | 0.051 (0.22)        | 0.82         | 0.20 (0.18) [F]                   | 0.28              | 0.23             | 31.3               |
|            | Vol.            | −0.061 (0.038)       | 0.11         | −0.0076 (0.029)     | 0.79         | −0.027 (0.023) [F]                | 0.28              | 0.27             | 19.3               |
|            | TSN             | −0.054 (0.64)        | 0.93         | −0.0055 (0.38)      | 0.99         | −0.018 (0.33) [F]                 | 0.96              | 0.95             | 0.0                |
|            | TMSN            | −0.045 (0.50)        | 0.93         | −0.11 (0.31)        | 0.72         | −0.095 (0.27) [F]                 | 0.72              | 0.91             | 0.0                |
|            | Motility (%)    | 1.16 (1.88)          | 0.54         | −0.52 (1.08)        | 0.63         | −0.10 (0.94) [F]                  | 0.91              | 0.44             | 0.0                |
| rs7174015  | Conc.           | −0.28 (0.32)         | 0.38         | 0.11 (0.22)         | 0.61         | −0.014 (0.18) [F]                 | 0.94              | 0.31             | 2.1                |
|            | Vol.            | <b>0.079 (0.037)</b> | <b>0.031</b> | −0.0002 (0.028)     | 0.99         | 0.036 (0.040) [R]                 | 0.36              | 0.085            | 66.3               |
|            | TSN             | 0.44 (0.62)          | 0.48         | 0.13 (0.37)         | 0.73         | 0.21 (0.32) [F]                   | 0.51              | 0.66             | 0.0                |
|            | TMSN            | 0.41 (0.48)          | 0.40         | 0.079 (0.31)        | 0.80         | 0.17 (0.26) [F]                   | 0.51              | 0.57             | 0.0                |
|            | Motility (%)    | 1.00 (1.82)          | 0.58         | −0.032 (1.05)       | 0.98         | 0.23 (0.91) [F]                   | 0.80              | 0.62             | 0.0                |
| rs724078   | Conc.           | 0.093 (0.26)         | 0.72         | 0.069 (0.17)        | 0.69         | 0.076 (0.14) [F]                  | 0.60              | 0.94             | 0.0                |
|            | Vol.            | −0.049 (0.030)       | 0.87         | 0.019 (0.023)       | 0.40         | 0.011 (0.018) [F]                 | 0.56              | 0.52             | 0.0                |
|            | TSN             | 0.17 (0.50)          | 0.74         | 0.15 (0.30)         | 0.61         | 0.16 (0.26) [F]                   | 0.55              | 0.98             | 0.0                |
|            | TMSN            | −0.24 (0.40)         | 0.55         | 0.25 (0.25)         | 0.31         | 0.12 (0.21) [F]                   | 0.58              | 0.30             | 8.5                |
|            | Motility (%)    | −1.33 (1.48)         | 0.37         | 0.84 (0.85)         | 0.32         | 0.31 (0.74) [F]                   | 0.68              | 0.20             | 38.3               |

Data are shown as the estimated liner regression statistic  $\beta$ , standard error (SE) and P-value with adjustments for age, BMI and ejaculation abstinence. Motility and total motile sperm number were additionally adjusted for time from masturbation to test. The sperm concentration, semen volume, total sperm number and total motile sperm number were processed using square-root-transformed values. Bold numbers indicate P-values of <0.05.

Conc., sperm concentration; Vol., semen volume; TSN, total sperm numbers; TMSN, total motile sperm numbers; P<sub>het</sub>, P-value for heterogeneity.

<sup>a</sup>The  $\beta$ -coefficient and its SE were summarized using an inverse variance-weighted meta-analysis under fixed-effects model [F] or the DerSimonian and Laird method under random-effects model [R].

## Reference

- Gabriel SB, Schaffner SF, Nguyen H, Moore JM, Roy J, Blumenstiel B, Higgins J, DeFelice M, Lochner A, Faggart M *et al.* The structure of haplotype blocks in the human genome. *Science* 2002;**296**:2225–2229.
